# Supplementary material
Source: Royal Society of Chemistry journal article supplement (doi:10.1039/d6ma00145a)
Supplement: d6ma00145a1.pdf [file d6ma00145a1.pdf]

## **Novel Chitosan hybrid fluorinated Thiourea derivative as Dual promising Anti-Microbial and Biofilm Agents: Tailoring Molecular Interactions, *In-silico* Toxicity, and Docking Simulation**

Moustafa S. Abusaif <sup>a, b, \*</sup>, Ahmed Ragab <sup>b, c, \*</sup>, Mohamed A. Salem <sup>d</sup>, Nabila A. maziad <sup>e</sup>, and Yousry A. Ammar <sup>b</sup>

<sup>a</sup> Department for Synthesis and Characterization of Polymers, Polymer Institute of the Slovak Academy of Sciences, Dúbravská cesta 9, 845 41 Bratislava, Slovak Republic.

<sup>b</sup> Department of Chemistry, Faculty of Science (boys), Al-Azhar University, 11884 Nasr City, Cairo-Egypt.

<sup>c</sup> Chemistry Department, Faculty of Science, Galala University, Galala City, Suez, 43511, Egypt.

<sup>d</sup> Health Specialties, Basic Sciences and Their Applications Unit, Applied College, Muhayl Asir, King Khalid University, Abha 62529, Saudi Arabia.

<sup>e</sup> Polymer chemistry department, National center for radiation research and technology, Atomic energy authority, Cairo, Egypt.

\* Corresponding authors.

Emails: moustafa.samir@savba.sk, mostafahozaiifa317@azhar.edu.eg (Moustafa S. Abusaif); ahmed\_ragab@azhar.edu.eg, ahmed.abdelwahab@gu.edu.eg (Ahmed Ragab).

# Supplementary material

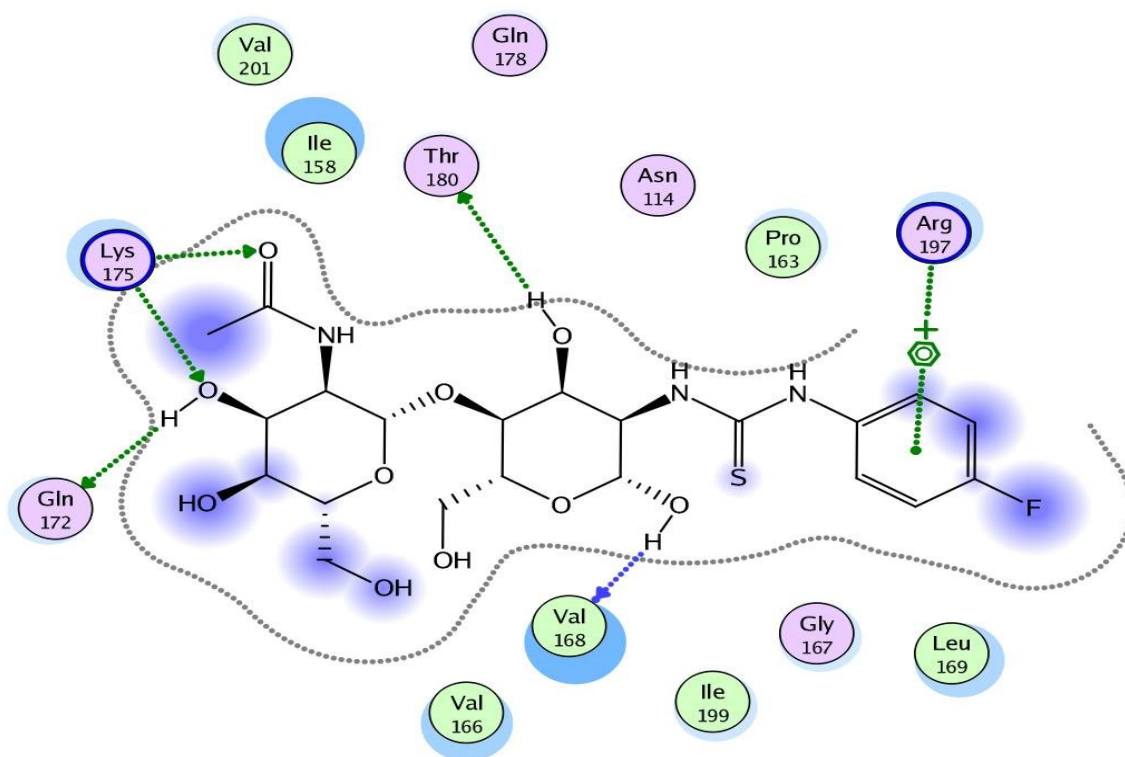

**Figure (SI1):** 2D docking conformation of **CHTUD1** inside the active site of Sortase A (**PDB:** 1T2P)

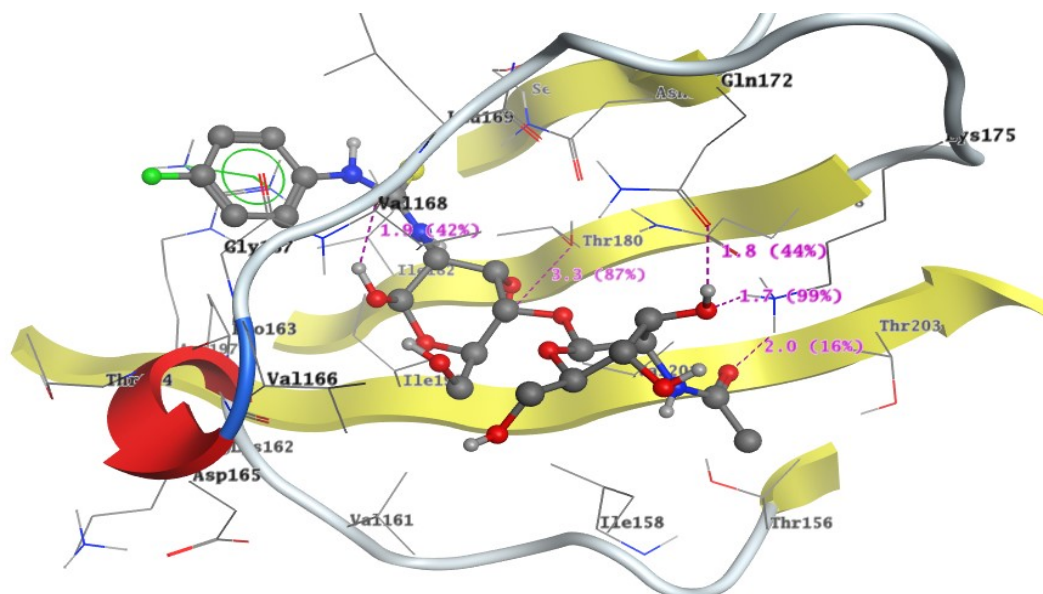

**Figure (SI2):** 3D docking conformation of **CHTUD1** inside the active site of Sortase A (PDB: 1T2P)

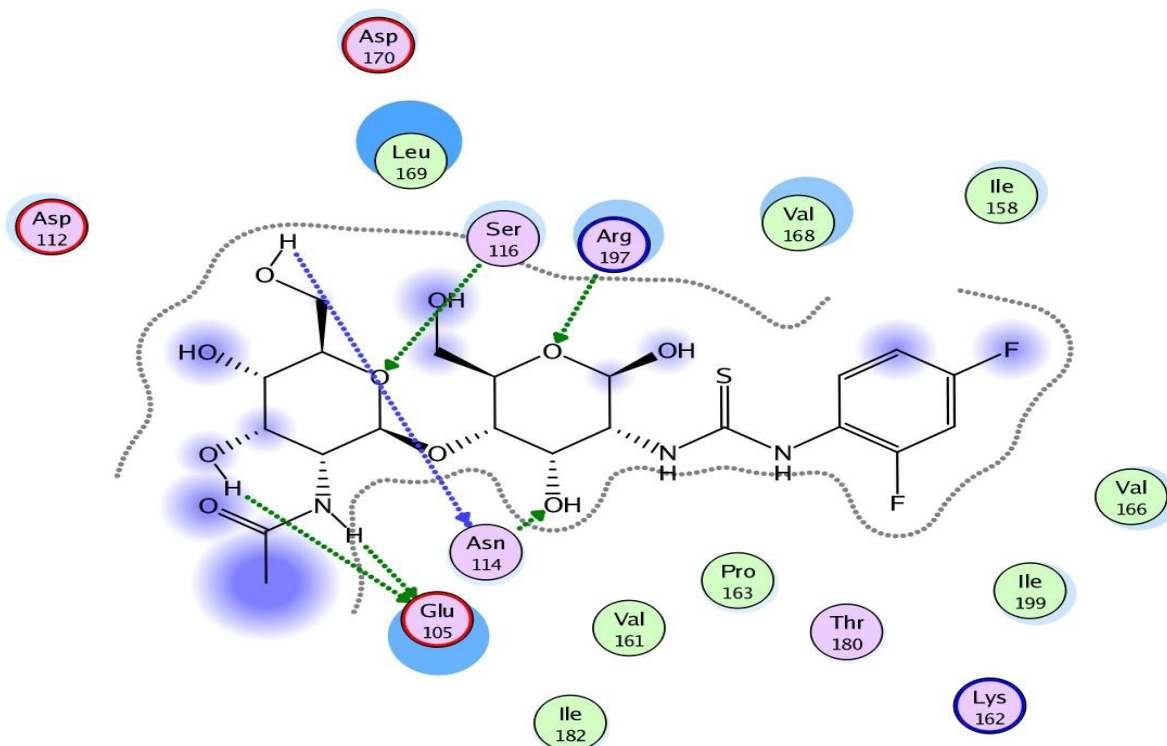

**Figure (SI3):** 2D docking conformation of **CHTUD2** inside the active site of Sortase A (PDB: 1T2P)

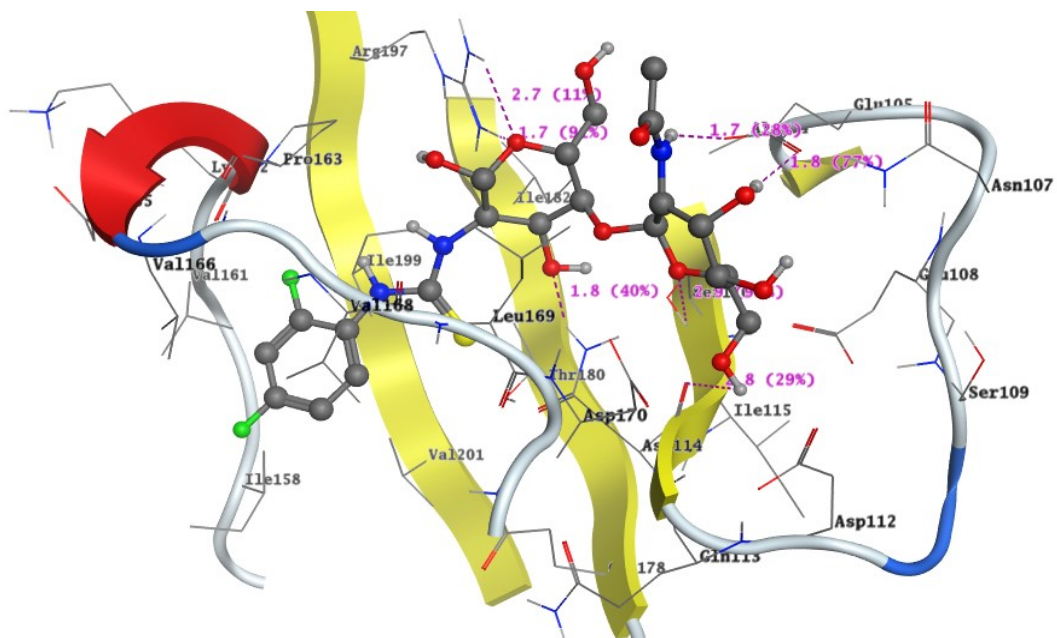

**Figure (SI4):** 3D docking conformation of CHTUD2 inside the active site of Sortase A (PDB: 1T2P)

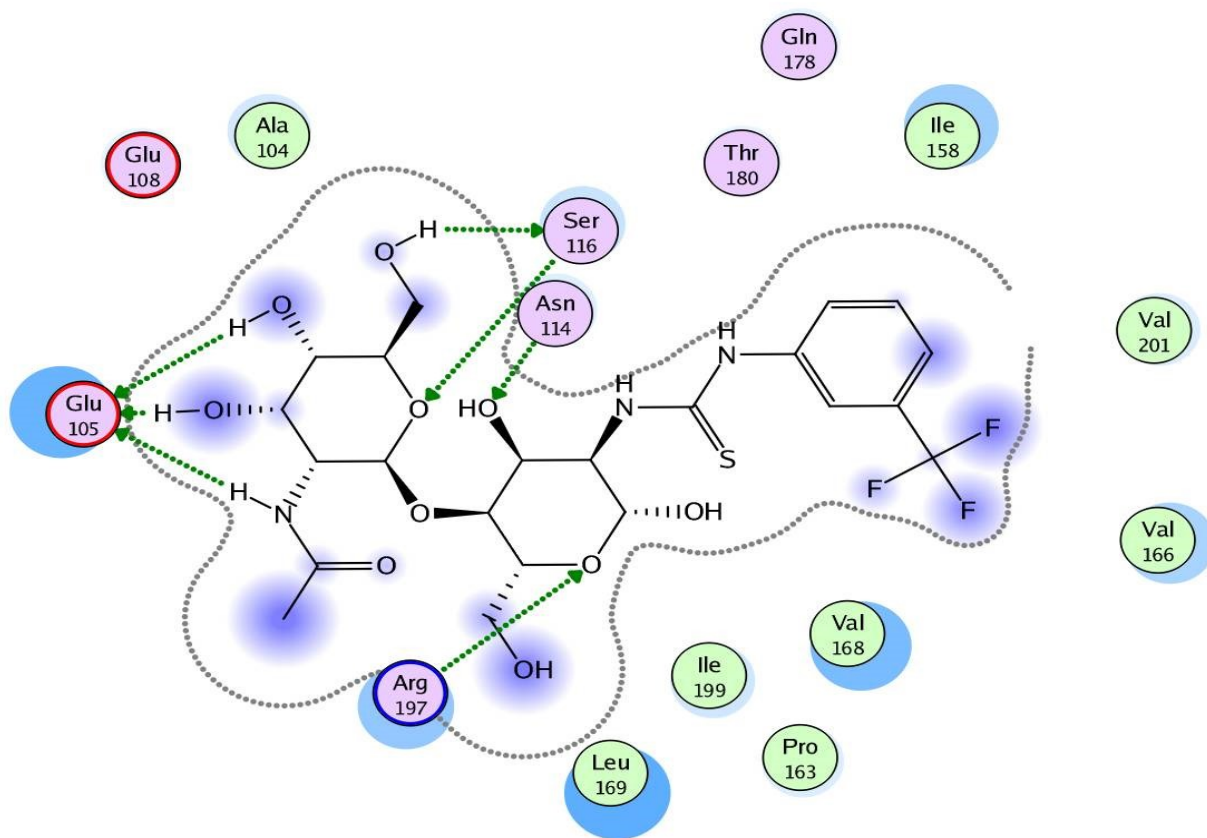

**Figure (SI5):** 2D docking conformation of **CHTUD3** inside the active site of Sortase A (**PDB: 1T2P**)

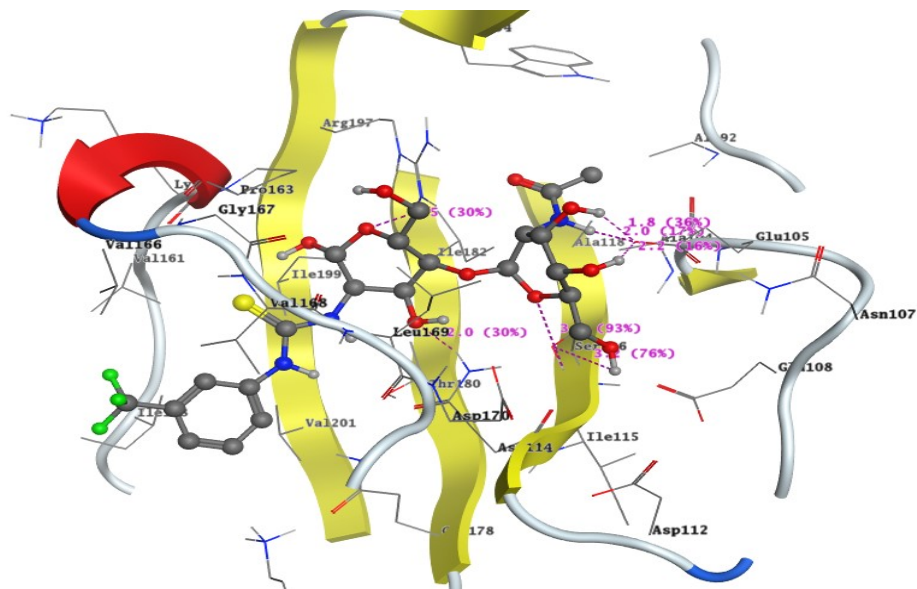

**Figure (SI6):** 3D docking conformation of **CHTUD3** inside the active site of Sortase A (**PDB: 1T2P**)

Docking process inside the active site of LpxC (**PDB: 4IS9**)

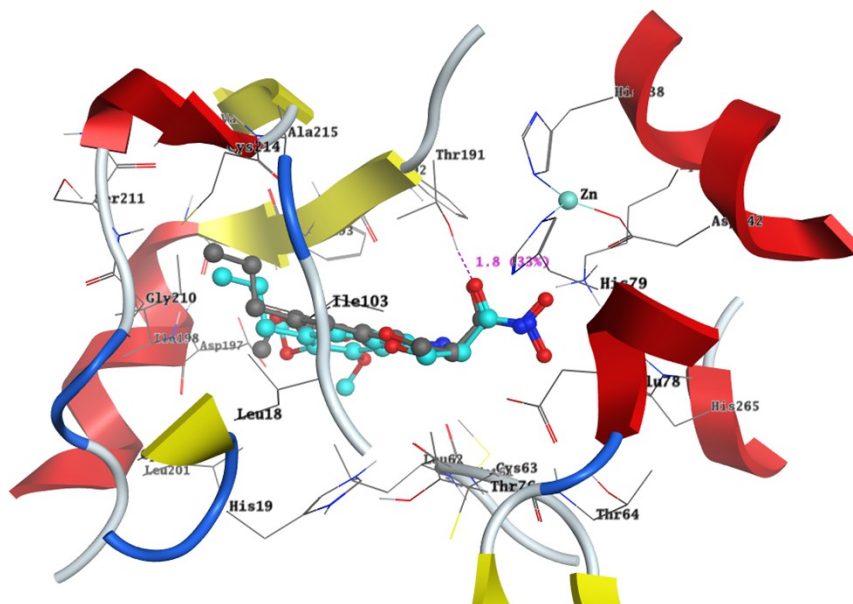

**Figure (SI7):** 3D docking conformation of superimposed structure of **co-crystallized ligand** inside the active site of LpxC (PDB: 4IS9)

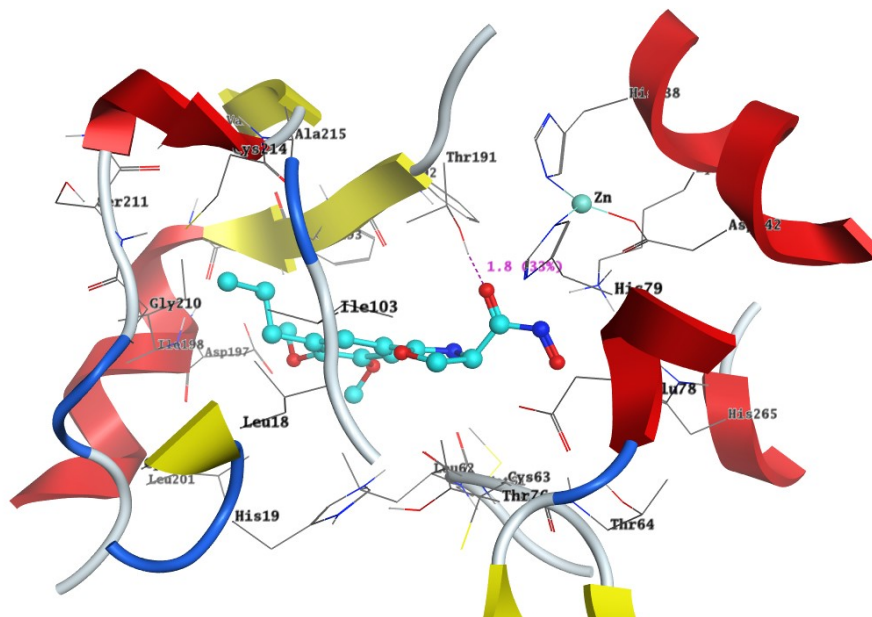

**Figure (SI8):** 2D docking conformation of **co-crystallized ligand** inside the active site of LpxC (PDB: 4IS9)

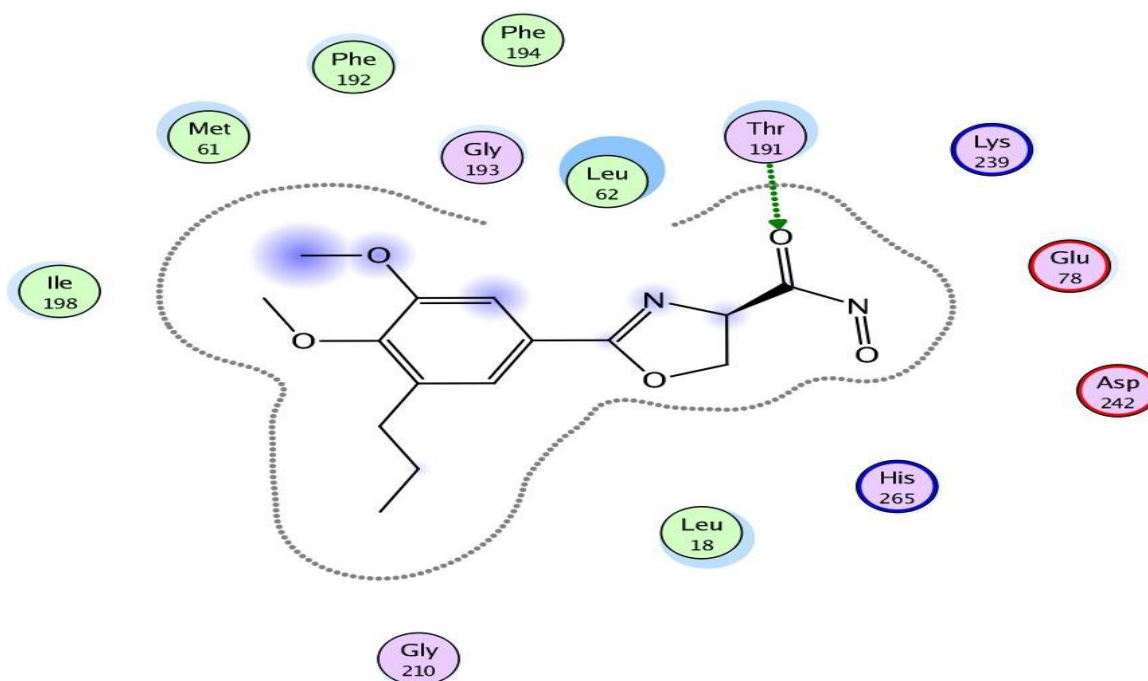

**Figure (SI9):** 3D docking conformation of **co-crystallized ligand** inside the active site of LpxC (PDB: 4IS9)

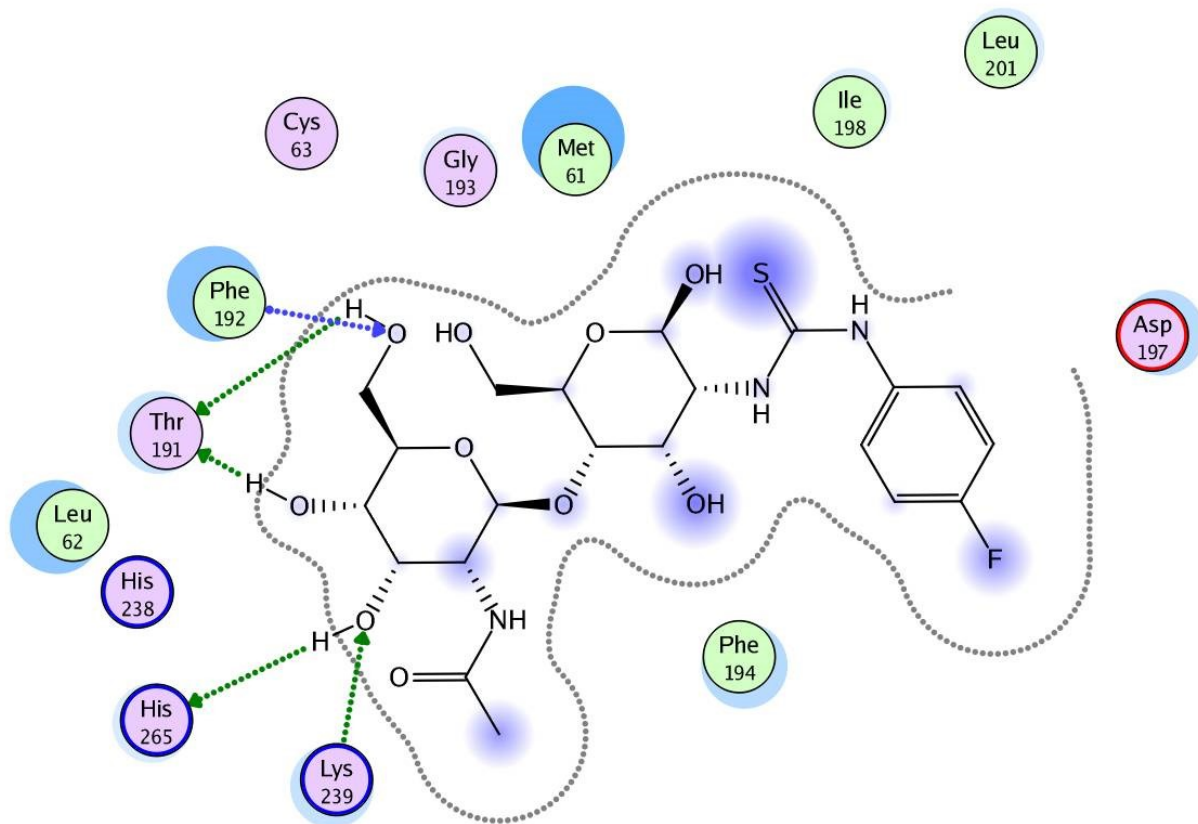

**Figure (SI10):** 2D docking conformation of **CHTUD1** inside the active site of **LpxC** (**PDB: 4IS9**)

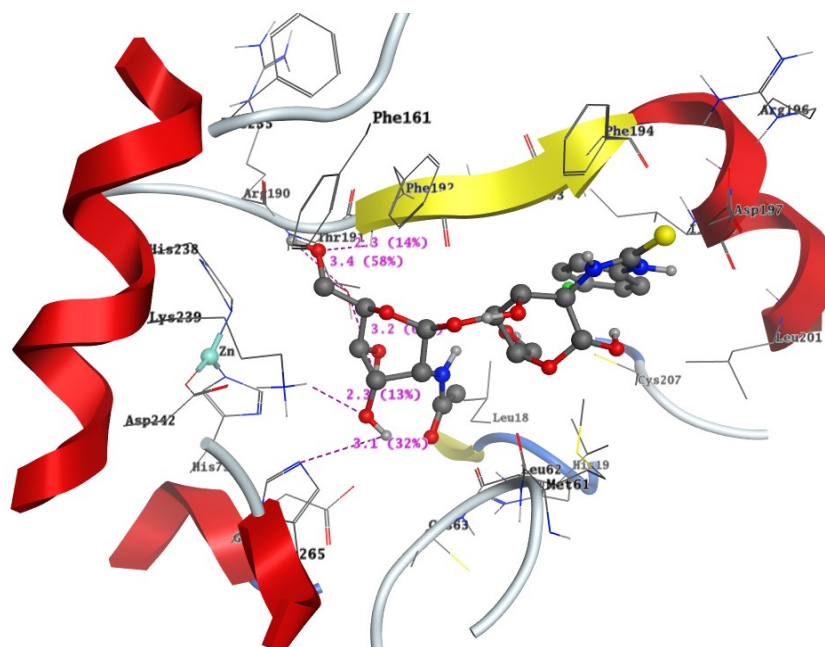

**Figure (SI11):** 3D docking conformation of **CHTUD1** inside the active site of LpxC (**PDB:** 4IS9)

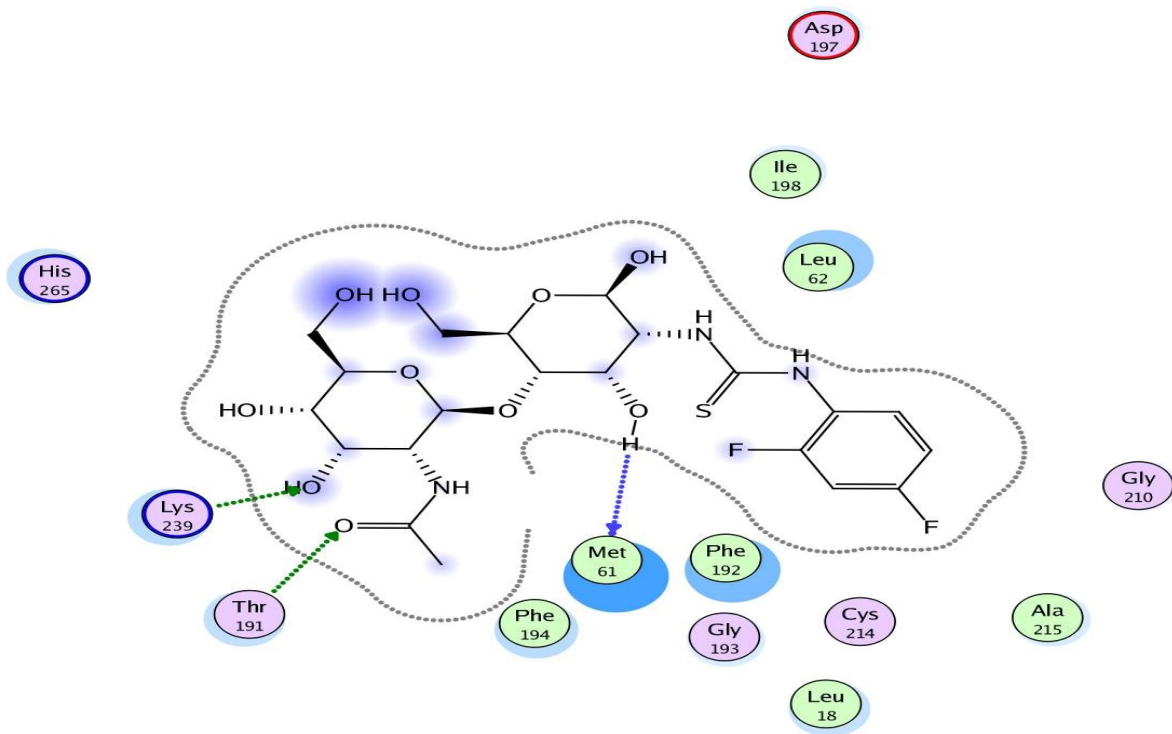

**Figure (SI12):** 2D docking conformation of **CHTUD2** inside the active site of LpxC (**PDB:** 4IS9)

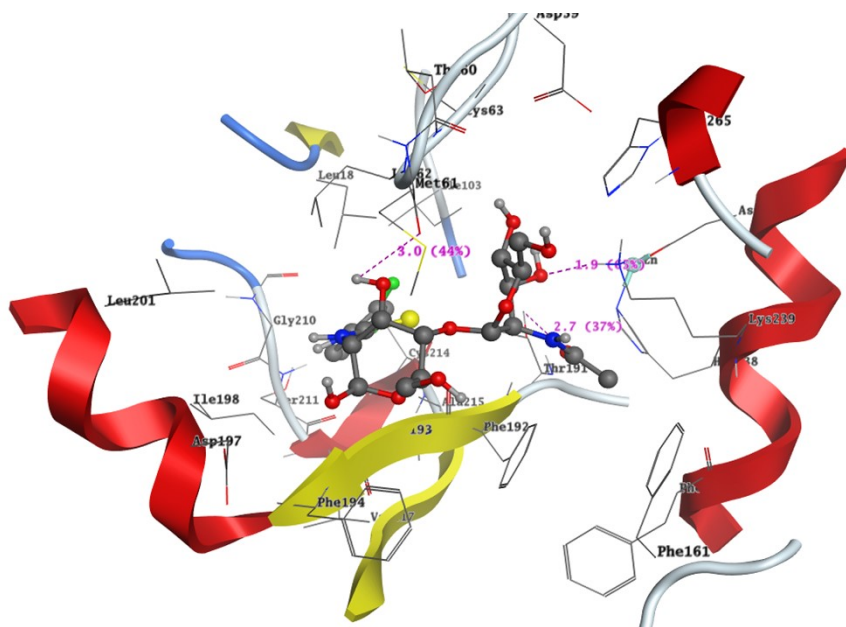

**Figure (SI13):** 3D docking conformation of **CHTUD2** inside the active site of LpxC (**PDB:** 4IS9)

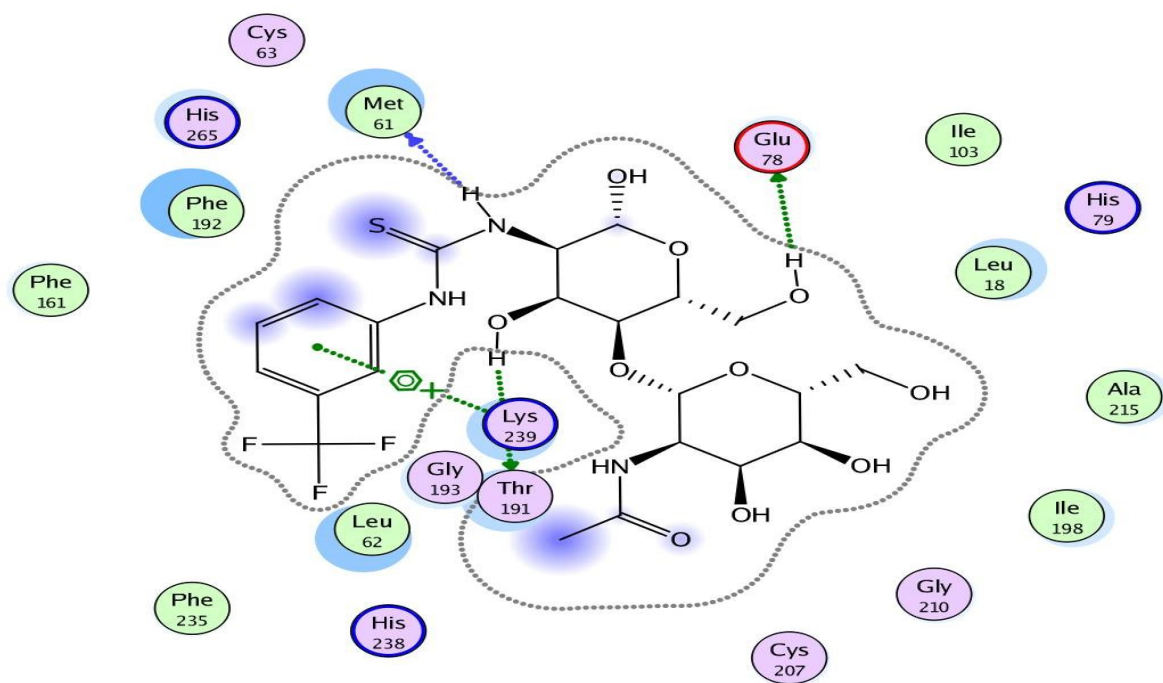

**Figure (SI14):** 2D docking conformation of **CHTUD3** inside the active site of LpxC (**PDB:** 4IS9)

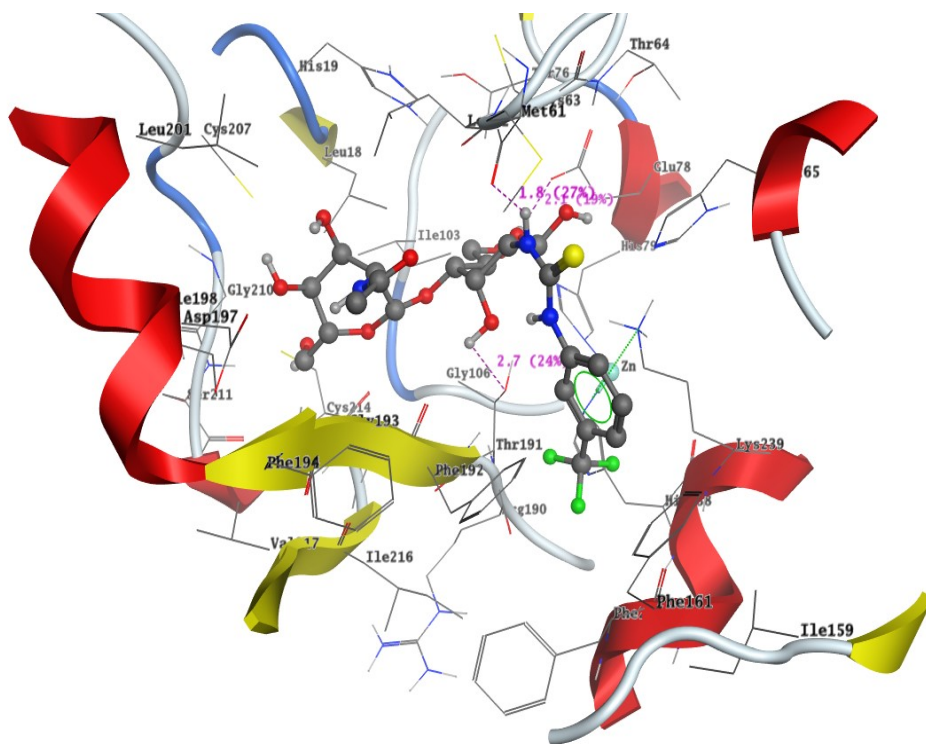

**Figure (SI15):** 3D docking conformation of **CHTUD3** inside the active site of LpxC (**PDB: 4IS9**)

**Biofilm activity raw data**

| <b>Anti Biofilm of Salmonella for sample N5</b> | Replicate1 Ab | Replicate2 Ab | Replicate 3 Ab | Mean  | Anti-Biofilm Activity % | SD    |
|-------------------------------------------------|---------------|---------------|----------------|-------|-------------------------|-------|
| Blank (Media only)                              | 0.012         | 0.008         | 0.005          | 0.008 |                         | 0.004 |
| Media+Organism(Cont.)                           | 1.222         | 1.231         | 1.226          | 1.226 | -                       | 0.005 |
| 75% of MBC                                      | 0.091         | 0.085         | 0.082          | 0.086 | 93.06                   | 0.005 |
| 50% of MBC                                      | 0.221         | 0.226         | 0.223          | 0.223 | 81.85                   | 0.003 |
| 25% of MBC                                      | 0.314         | 0.315         | 0.318          | 0.316 | 74.31                   | 0.002 |

| <b>Anti Biofilm of Salmonella for sample N7</b> | Replicate1 Ab | Replicate2 Ab | Replicate 3 Ab | Mean  | Anti-Biofilm Activity % | SD    |
|-------------------------------------------------|---------------|---------------|----------------|-------|-------------------------|-------|
| Blank (Media only)                              | 0.012         | 0.008         | 0.005          | 0.008 |                         | 0.004 |
| Media+Organism(Cont.)                           | 1.222         | 1.231         | 1.226          | 1.226 | -                       | 0.005 |
| 75% of MBC                                      | 0.112         | ,116          | 0.119          | 0.077 | 93.80                   | 0.005 |
| 50% of MBC                                      | 0.214         | 0.209         | 0.199          | 0.207 | 83.16                   | 0.008 |
| 25% of MBC                                      | 0.289         | 0.291         | 0.295          | 0.292 | 76.27                   | 0.003 |

| <b>Anti Biofilm of Salmonella for sample N6</b> | Replicate1 Ab | Replicate2 Ab | Replicate 3 Ab | Mean  | Anti-Biofilm Activity % | SD    |
|-------------------------------------------------|---------------|---------------|----------------|-------|-------------------------|-------|
| Blank (Media only)                              | 0.012         | 0.008         | 0.005          | 0.008 |                         | 0.004 |
| Media+Organism(Cont.)                           | 1.222         | 1.231         | 1.226          | 1.226 | -                       | 0.005 |
| 75% of MBC                                      | 0.102         | 0.099         | 0.107          | 0.103 | 91.70                   | 0.004 |
| 50% of MBC                                      | 0.273         | 0.278         | 0.277          | 0.276 | 77.55                   | 0.003 |
| 25% of MBC                                      | 0.383         | 0.391         | 0.387          | 0.387 | 68.49                   | 0.004 |

| <b>Anti Biofilm of Salmonella for sample CH</b> | Replicate1 Ab | Replicate2 Ab | Replicate 3 Ab | Mean  | Anti-Biofilm Activity % | SD    |
|-------------------------------------------------|---------------|---------------|----------------|-------|-------------------------|-------|
| Blank (Media only)                              | 0.012         | 0.008         | 0.005          | 0.008 |                         | 0.004 |
| Media+Organism(Cont.)                           | 1.222         | 1.231         | 1.226          | 1.226 | -                       | 0.005 |
| 75% of MBC                                      | 0.116         | 0.118         | 0.122          | 0.119 | 90.39                   | 0.003 |
| 50% of MBC                                      | 0.325         | 0.327         | 0.325          | 0.326 | 73.50                   | 0.001 |
| 25% of MBC                                      | 0.603         | 0.598         | 0.594          | 0.598 | 51.24                   | 0.005 |

| <b>Anti Biofilm of St. aureus for Sample N5</b> | Replicate1 Ab | Replicate2 Ab | Replicate 3 Ab | Mean  | Anti-Biofilm Activity % | SD    |
|-------------------------------------------------|---------------|---------------|----------------|-------|-------------------------|-------|
| Blank (Media only)                              | 0.01          | 0.007         | 0.002          | 0.006 |                         | 0.004 |
| Media+Organism(Cont.)                           | 1.132         | 1.137         | 1.141          | 1.137 | -                       | 0.005 |
| 75% of MBC                                      | 0.044         | 0.042         | 0.041          | 0.042 | 96.36                   | 0.002 |
| 50% of MBC                                      | 0.214         | 0.201         | 0.207          | 0.207 | 81.84                   | 0.007 |
| 25% of MBC                                      | 0.313         | 0.311         | 0.308          | 0.311 |                         | 0.003 |

|  |  |  |  |  |       |  |
|--|--|--|--|--|-------|--|
|  |  |  |  |  | 72.74 |  |
|--|--|--|--|--|-------|--|

| <b>Anti Biofilm of St. aereus for Sample N7</b> | Replicate 1 Ab | Replicate 2 Ab | Replicate 3 Ab | Mean  | Anti-Biofilm Activity % | SD    |
|-------------------------------------------------|----------------|----------------|----------------|-------|-------------------------|-------|
| Blank (Media only)                              | 0.01           | 0.007          | 0.002          | 0.006 |                         | 0.004 |
| Media+Organism(Cont.)                           | 1.132          | 1.137          | 1.141          | 1.137 | -                       | 0.005 |
| 75% of MBC                                      | 0.06           | 0.055          | 0.051          | 0.055 | 95.22                   | 0.005 |
| 50% of MBC                                      | 0.214          | 0.201          | 0.207          | 0.207 | 82.04                   | 0.007 |
| 25% of MBC                                      | 0.321          | 0.317          | 0.309          | 0.317 | 72.87                   | 0.003 |

| <b>Anti Biofilm of St. aereus for Sample N6</b> | Replicate 1 Ab | Replicate 2 Ab | Replicate 3 Ab | Mean  | Anti-Biofilm Activity % | SD    |
|-------------------------------------------------|----------------|----------------|----------------|-------|-------------------------|-------|
| Blank (Media only)                              | 0.01           | 0.007          | 0.002          | 0.006 |                         | 0.004 |
| Media+Organism(Cont.)                           | 1.132          | 1.137          | 1.141          | 1.137 | -                       | 0.005 |
| 75% of MBC                                      | 0.082          | 0.081          | 0.084          | 0.082 | 92.84                   | 0.002 |
| 50% of MBC                                      | 0.312          | 0.305          | 0.301          | 0.306 | 73.15                   | 0.006 |
| 25% of MBC                                      | 0.435          | 0.443          | 0.445          | 0.441 | 61.27                   | 0.005 |

| <b>Anti Biofilm of St. aereus for Sample CH</b> | Replicate 1 Ab | Replicate 2 Ab | Replicate 3 Ab | Mean | Anti-Biofilm Activity % | SD |
|-------------------------------------------------|----------------|----------------|----------------|------|-------------------------|----|
|-------------------------------------------------|----------------|----------------|----------------|------|-------------------------|----|

|                       |       |       |       |       | y %   |           |
|-----------------------|-------|-------|-------|-------|-------|-----------|
| Blank (Media only)    | 0.01  | 0.007 | 0.002 | 0.006 |       | 0.00<br>4 |
| Media+Organism(Cont.) | 1.132 | 1.137 | 1.141 | 1.137 | -     | 0.00<br>5 |
| 75% of MBC            | 0.102 | 0.111 | 0.105 | 0.106 | 90.76 | 0.00<br>5 |
| 50% of MBC            | 0.345 | 0.354 | 0.348 | 0.349 | 69.37 | 0.00<br>5 |
| 25% of MBC            | 0.861 | 0.864 | 0.858 | 0.861 | 24.30 | 0.00<br>3 |
